# Supplementary material
Source: Research Square preprint supplement (doi:10.21203/rs.3.rs-9180785/v1)
Supplement: Supplementary file 1 [file 794d77d4f075f53b7f0592e0.docx]

**Supplementary Material**

**
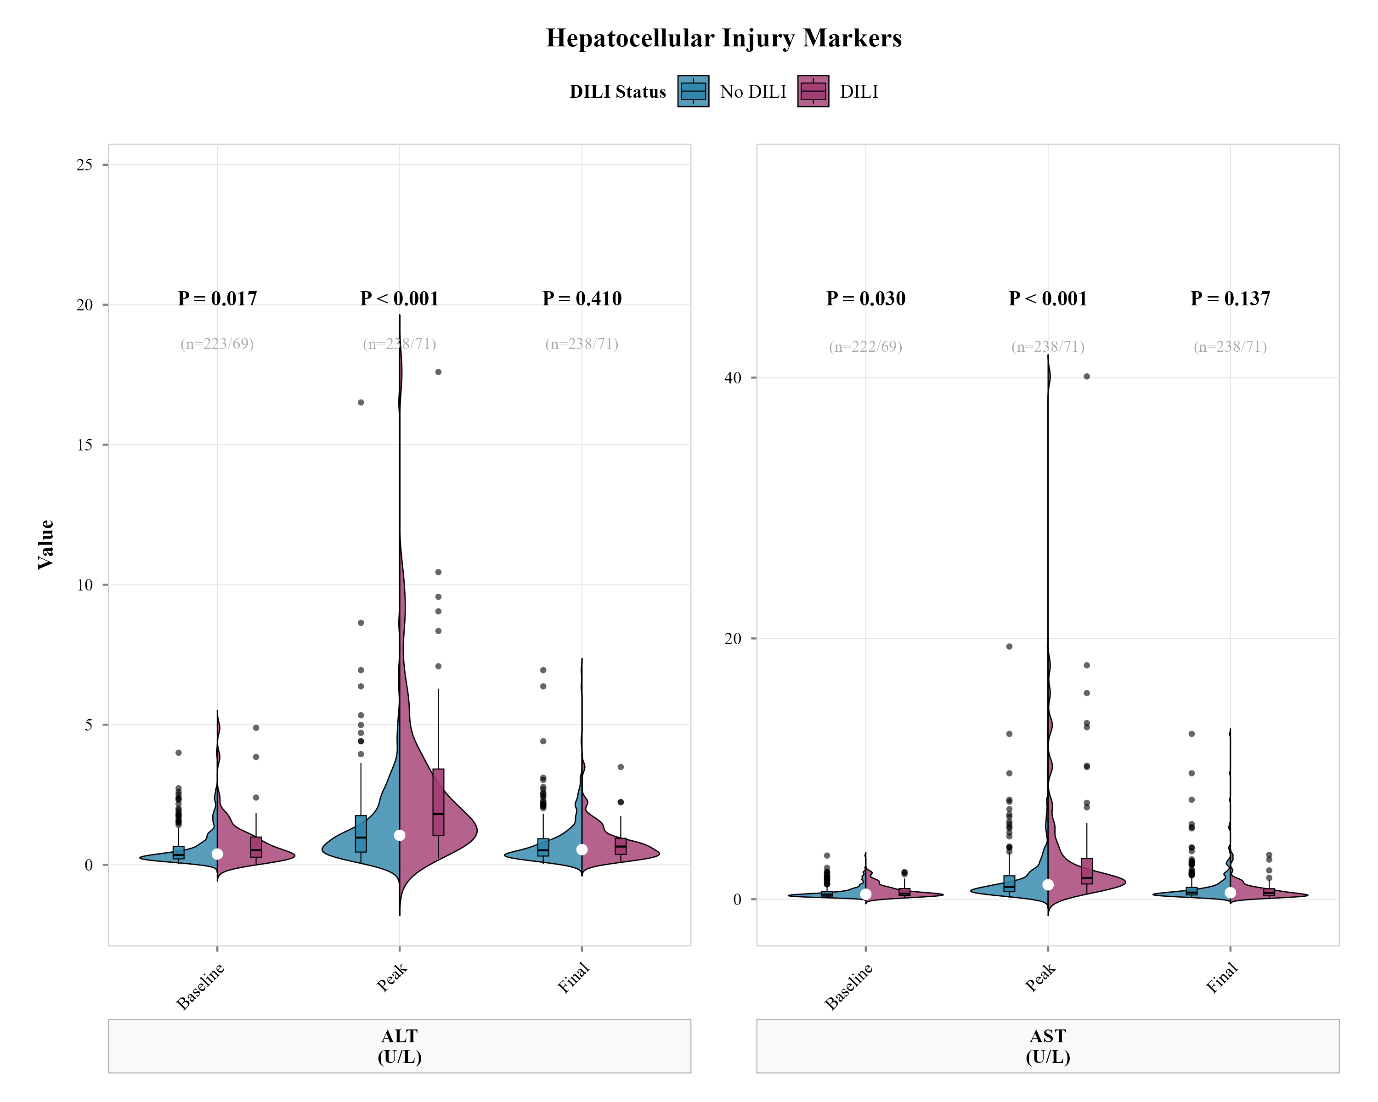
**

**Figure S1.** The violin plot was presented the distributions of hepatocellular injury markers between tigecycline-associated DILI status.


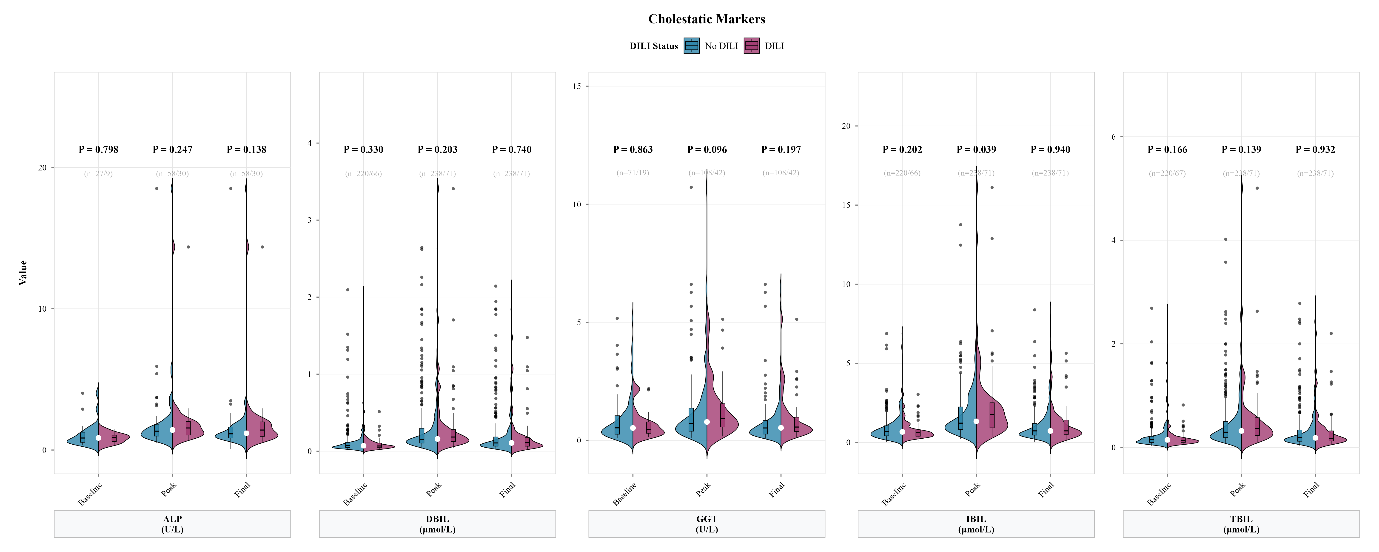


**Figure S2.** The violin plot was presented the distributions of cholestatic markers between tigecycline-associated DILI status.


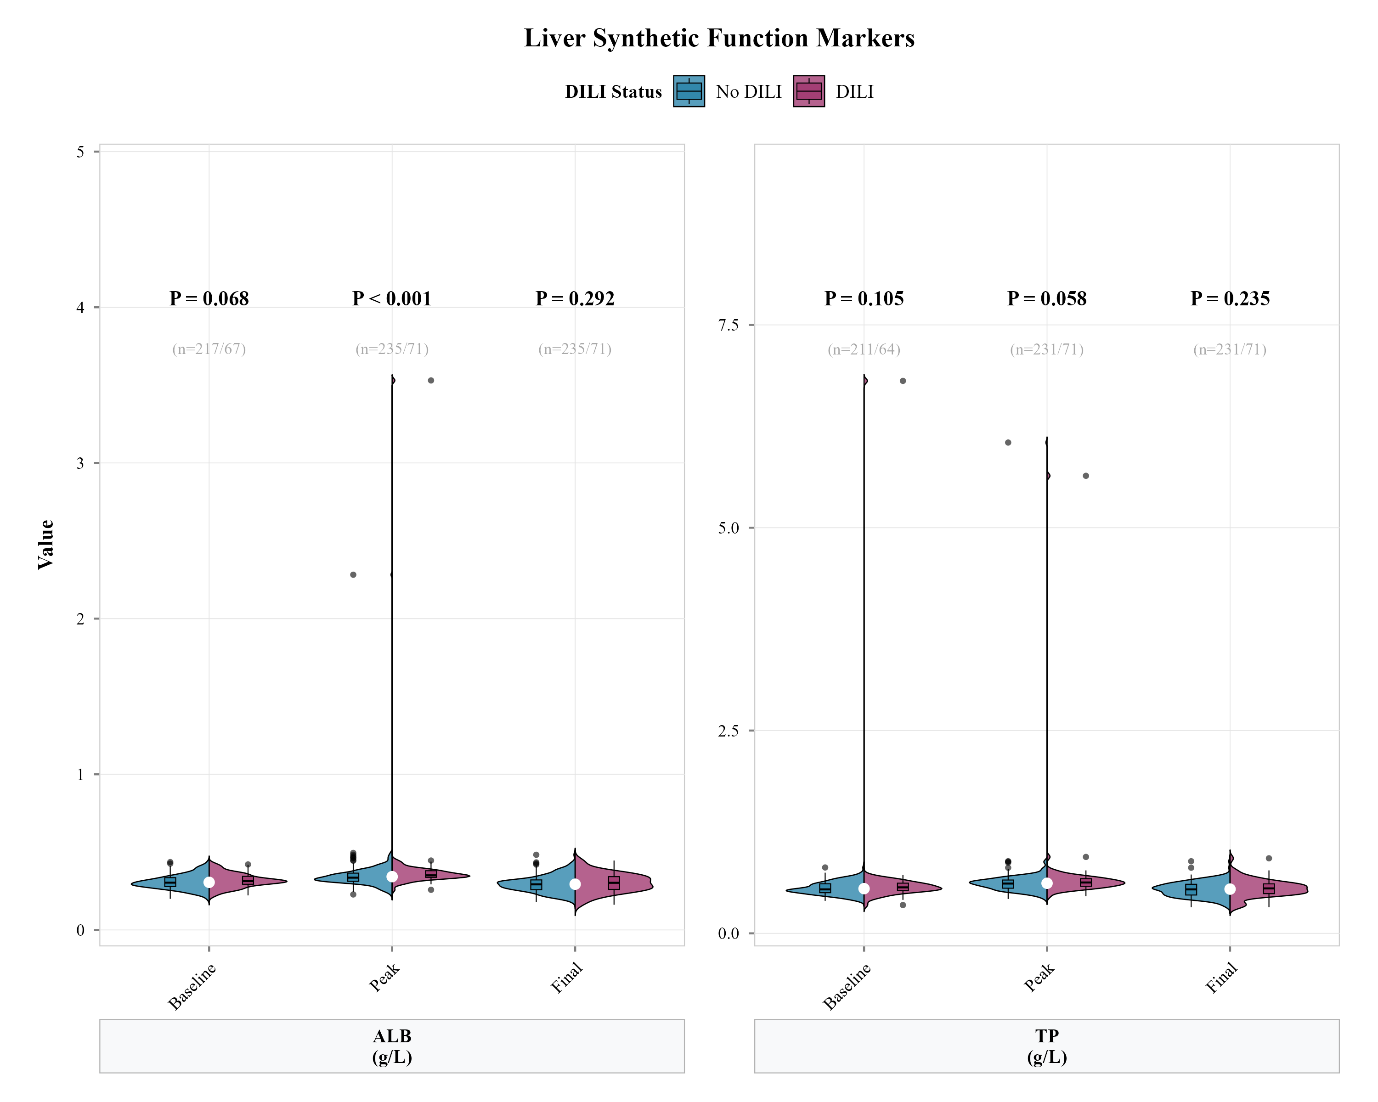


**Figure S3.** The violin plot was presented the distributions of liver synthetic function markers between tigecycline-associated DILI status.


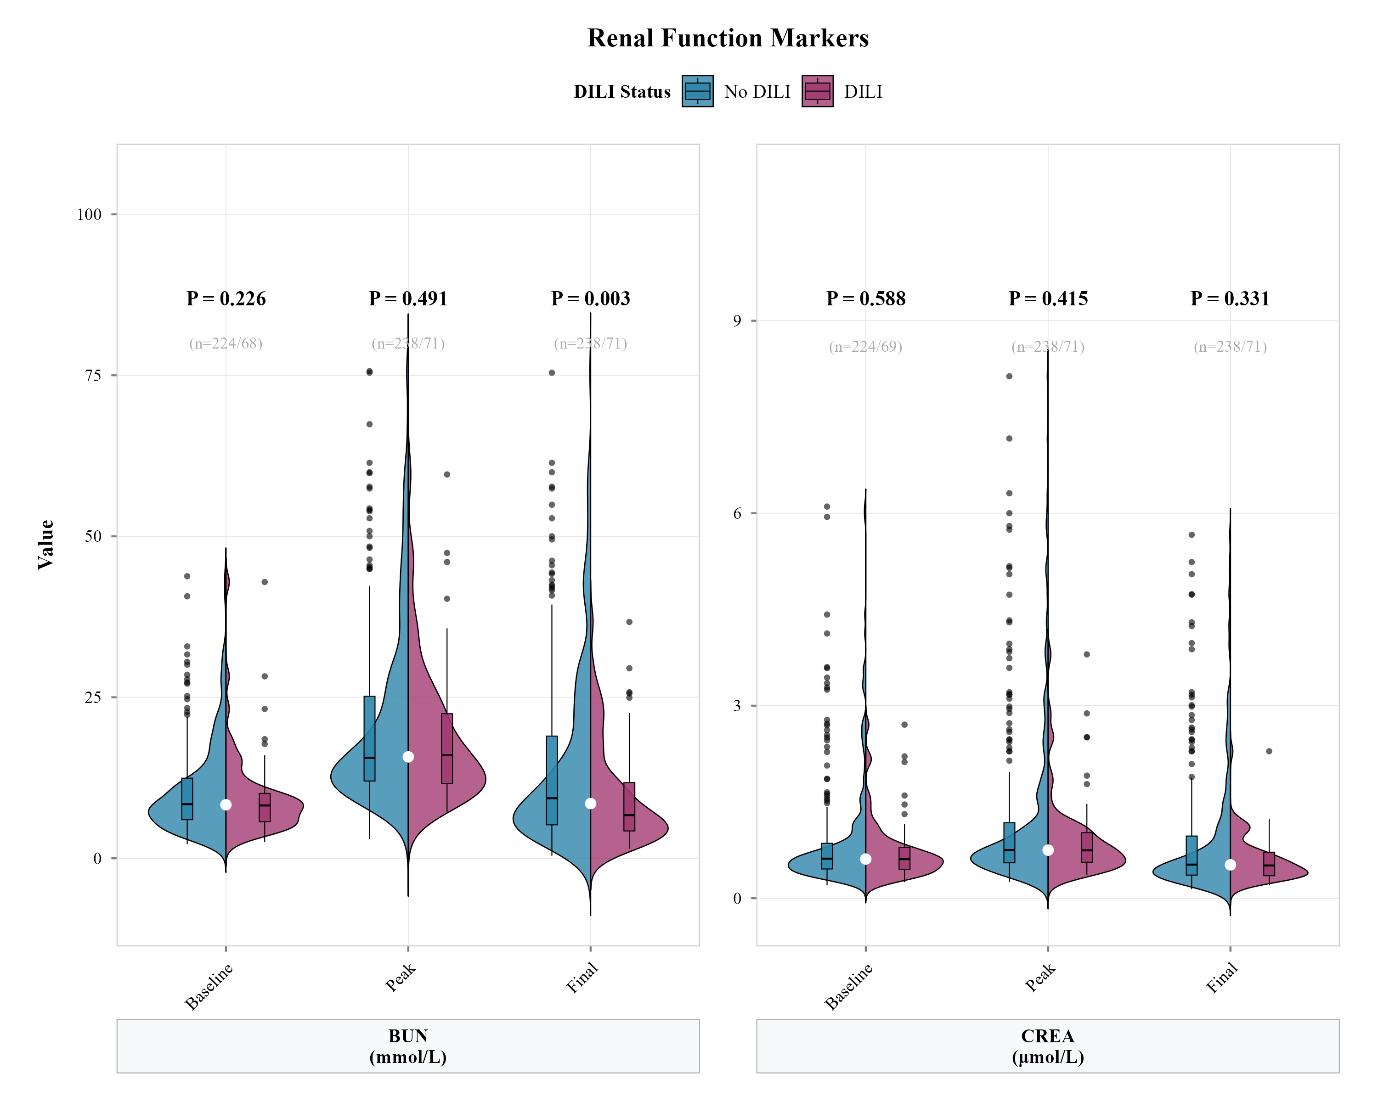


**Figure S4.** The violin plot was presented the distributions of renal function markers between tigecycline-associated DILI status.

**
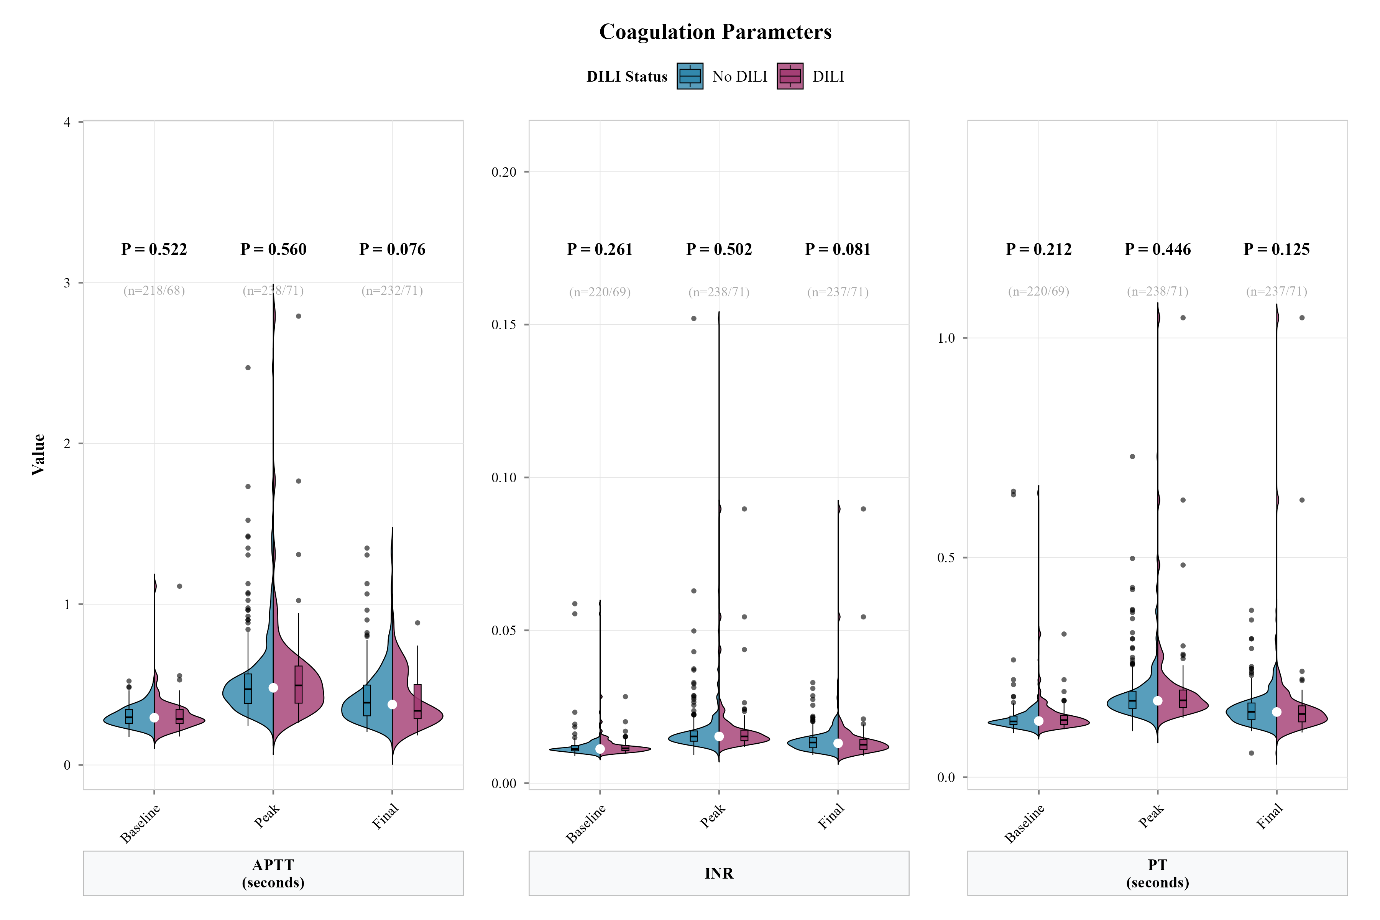
**

**Figure S5.** The violin plot was presented the distributions of coagulation parameters between tigecycline-associated DILI status.

**
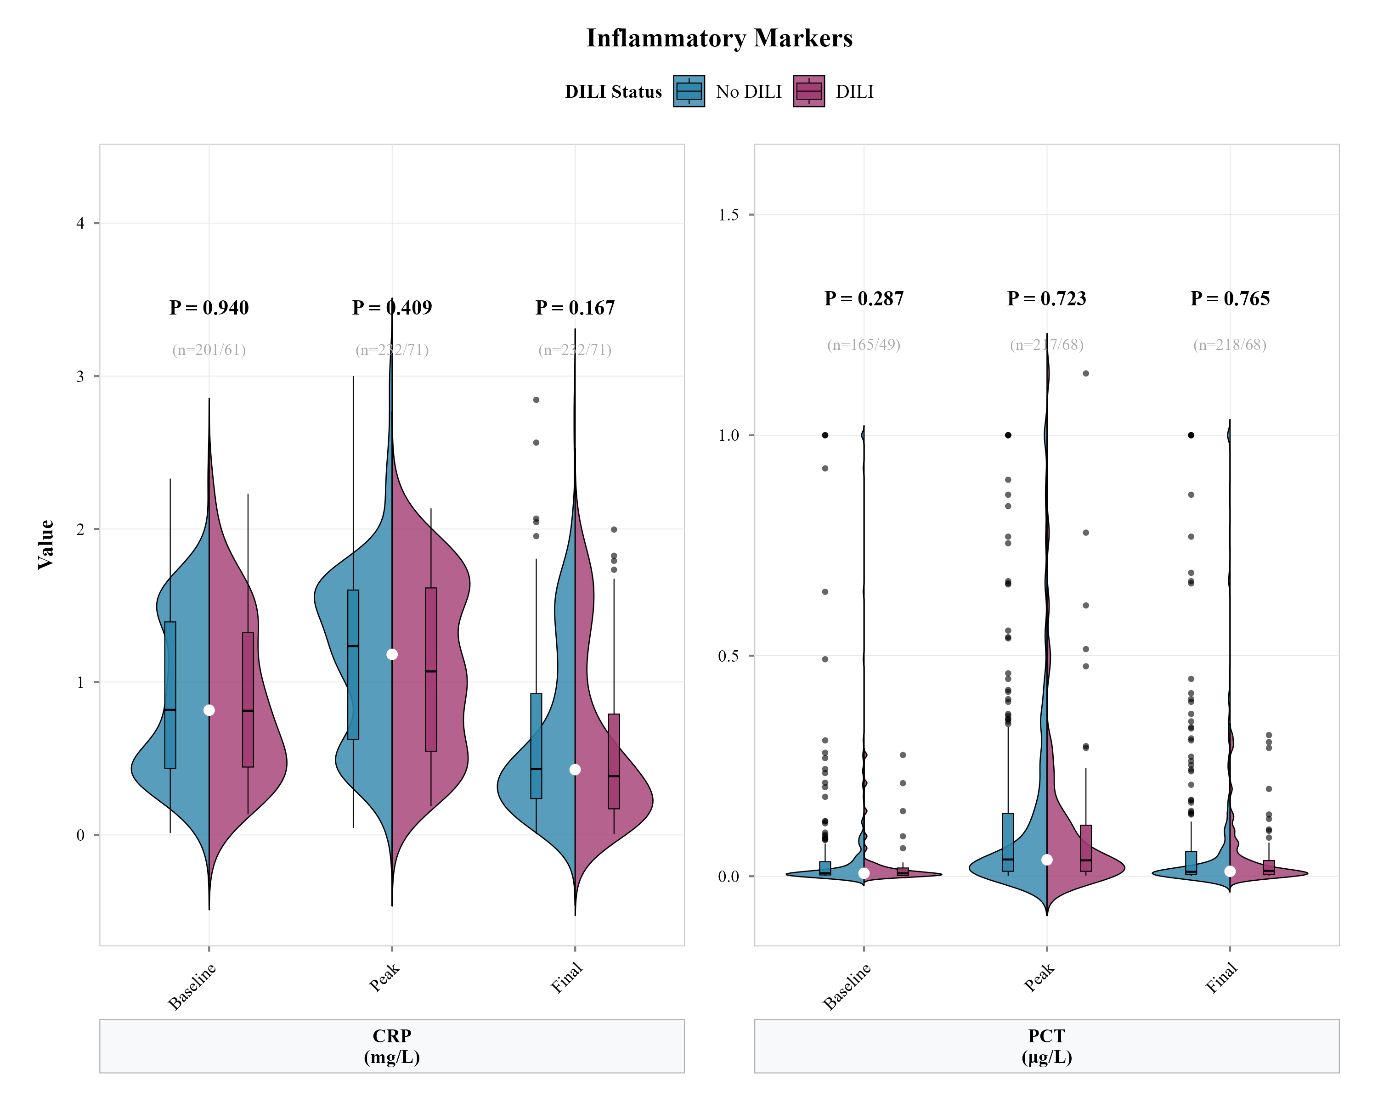
**

**Figure S6.** The violin plot was presented the distributions of inflammatory markers between tigecycline-associated DILI status.

**
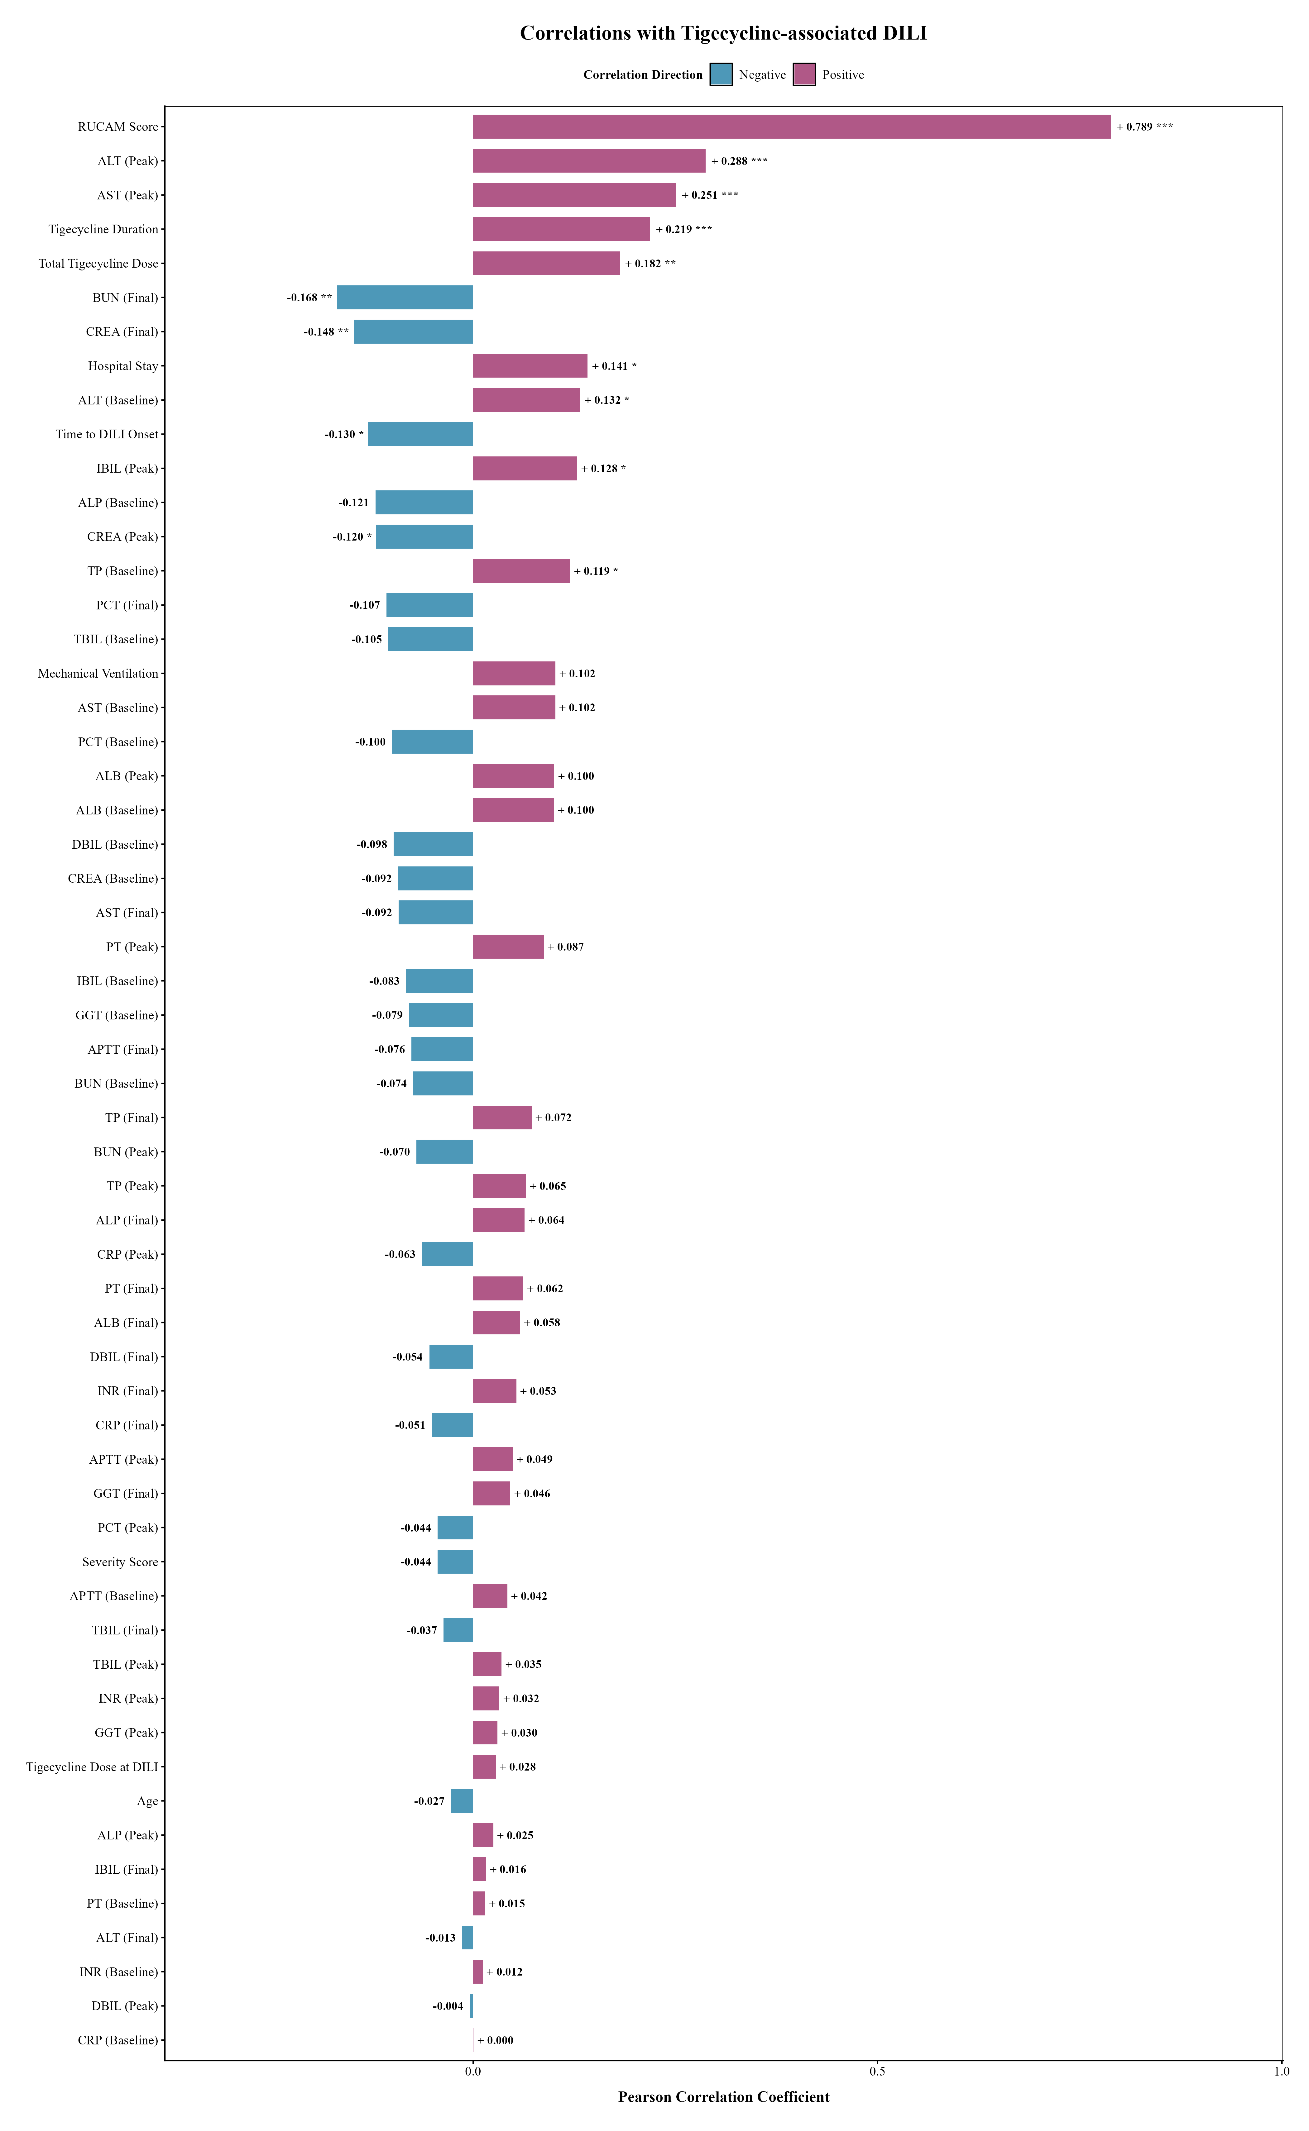
**

**Figure S7.** the correlations between all clinical parameters and tigecycline-associated DILI status by Pearson correlation
